# Supplementary material
Source: Springer Nature journal article supplement (https://www.springermedizin.de/resource/supplementary/12889_2011_3661_MOESM1_ESM.pdf/9489634)
Supplement: MOESM1 [file 9489634]

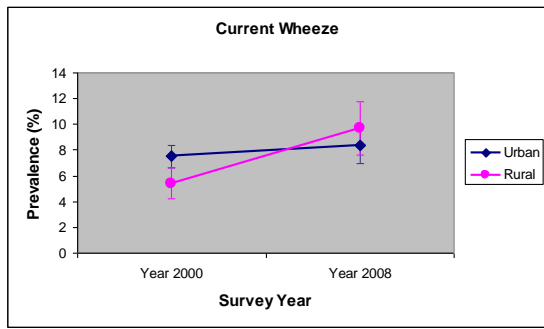

|       | Prevalence<br>Year 2000 | Prevalence<br>Year 2008 |
|-------|-------------------------|-------------------------|
| Urban | 7.5<br>(6.6-8.4)        | 8.4<br>(7.0-9.8)        |
| Rural | 5.4<br>(4.2-6.6)        | 9.7<br>(7.6-11.8)       |
|       | <sup>1</sup> p=0.01     | <sup>1</sup> p=0.33     |

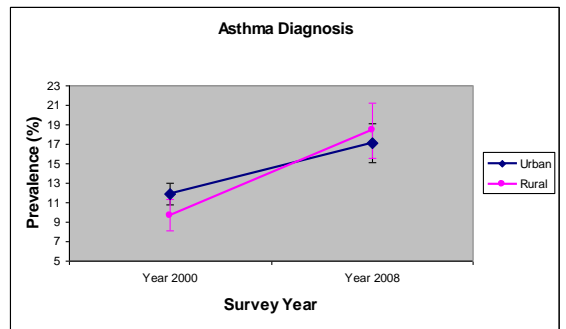

|       | Prevalence<br>Year 2000 | Prevalence<br>Year 2008 |
|-------|-------------------------|-------------------------|
| Urban | 11.9<br>(10.8-13.1)     | 17.1<br>(15.1-19.1)     |
| Rural | 9.7<br>(8.1-11.3)       | 18.4<br>(15.6-21.2)     |
|       | <sup>1</sup> p=0.03     | <sup>1</sup> p=0.49     |

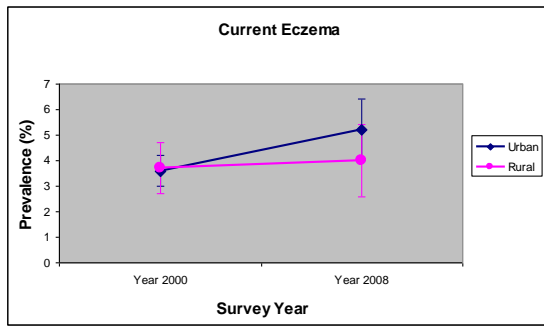

|       | Prevalence<br>Year 2000 | Prevalence<br>Year 2008 |
|-------|-------------------------|-------------------------|
| Urban | 3.6<br>(3.0-4.2)        | 5.2<br>(4.0-6.4)        |
| Rural | 3.7<br>(2.7-4.7)        | 4.0<br>(2.6-5.4)        |
|       | <sup>1</sup> p=0.84     | <sup>1</sup> p=0.22     |

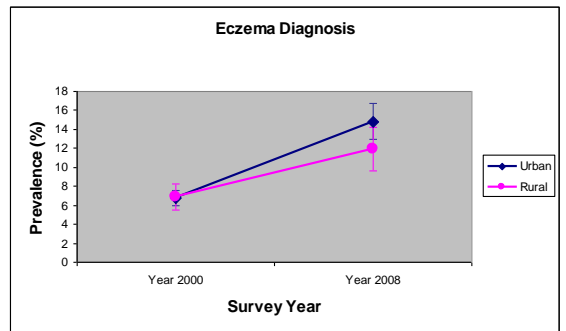

|       | Prevalence<br>Year 2000 | Prevalence<br>Year 2008 |
|-------|-------------------------|-------------------------|
| Urban | 6.8<br>(6.0-7.6)        | 14.8<br>(12.9-16.7)     |
| Rural | 6.9<br>(5.5-8.3)        | 11.9<br>(9.6-14.2)      |
|       | <sup>1</sup> p=0.83     | <sup>1</sup> p=0.08     |

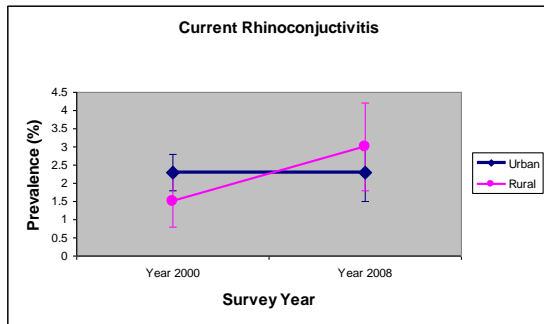

|       | Prevalence<br>Year 2000 | Prevalence<br>Year 2008 |
|-------|-------------------------|-------------------------|
| Urban | 2.3<br>(1.8-2.8)        | 2.3<br>(1.5-3.1)        |
| Rural | 1.5<br>(0.8-2.2)        | 3.0<br>(1.8-4.2)        |
|       | <sup>1</sup> p=0.15     | <sup>1</sup> p=0.34     |

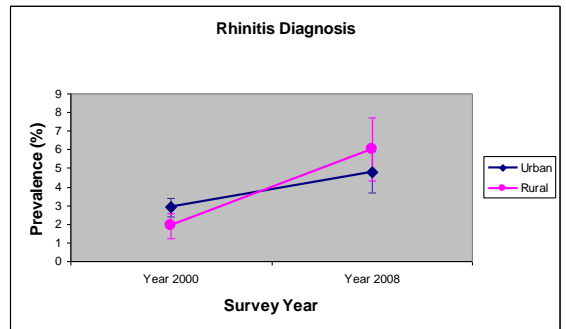

|       | Prevalence<br>Year 2000 | Prevalence<br>Year 2008 |
|-------|-------------------------|-------------------------|
| Urban | 2.9<br>(2.4-3.4)        | 4.8<br>(3.7-5.9)        |
| Rural | 1.9<br>(1.2-2.6)        | 6.0<br>(4.3-7.7)        |
|       | <sup>1</sup> p=0.08     | <sup>1</sup> p=0.24     |

<sup>1</sup>p value of chi-square test comparing the prevalence of asthma and allergy outcomes between urban and rural areas within each survey year.
